# Supplementary material for: Sloppy morphological tuning in identified neurons of the crustacean stomatogastric ganglion
Source: eLife journal article supplement (doi:10.7554/elife.22352), 2017-02-08
Supplement: supp [file elife-22352-supp-v1.zip]

Archive with 9 entries (9 files):
- elife_poa_e22352_Figure_11_figure_supplement_2.pdf
- elife_poa_e22352_Figure_11_figure_supplement_3.pdf
- elife_poa_e22352_Source_Data_File.zip
- elife_poa_e22352_Figure_1_figure_supplement_2.pdf
- elife_poa_e22352_Figure_1_figure_supplement_1.pdf
- elife_poa_e22352_Figure_1_figure_supplement_4.pdf
- elife_poa_e22352_Figure_11_figure_supplement_4.pdf
- elife_poa_e22352_Figure_11_figure_supplement_1.pdf
- elife_poa_e22352_Figure_1_figure_supplement_3.pdf
