# Supplementary figures and images for: Sloppy morphological tuning in identified neurons of the crustacean stomatogastric ganglion
Source: eLife journal article supplement (doi:10.7554/elife.22352), 2017-02-08

## A LG Neuron 1

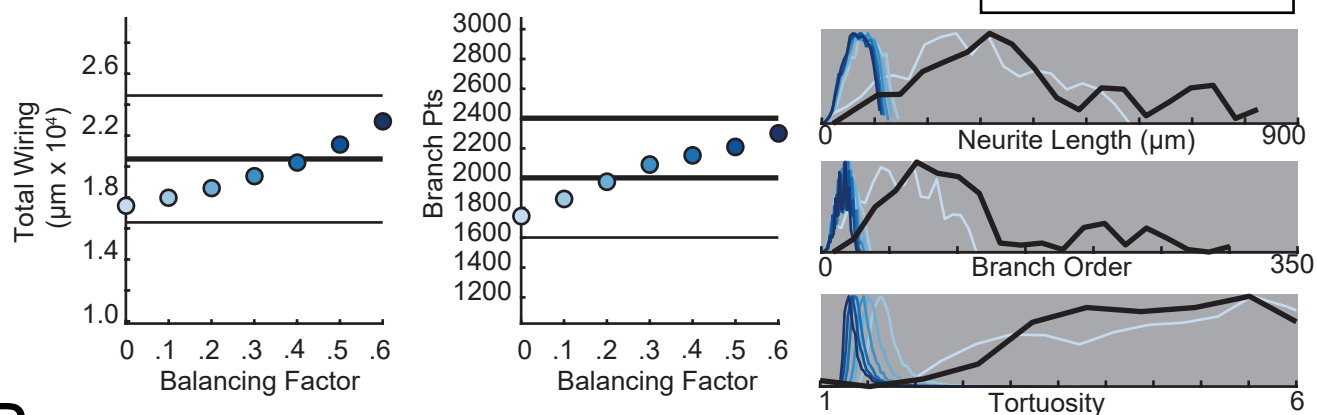

## B LG Neuron 2

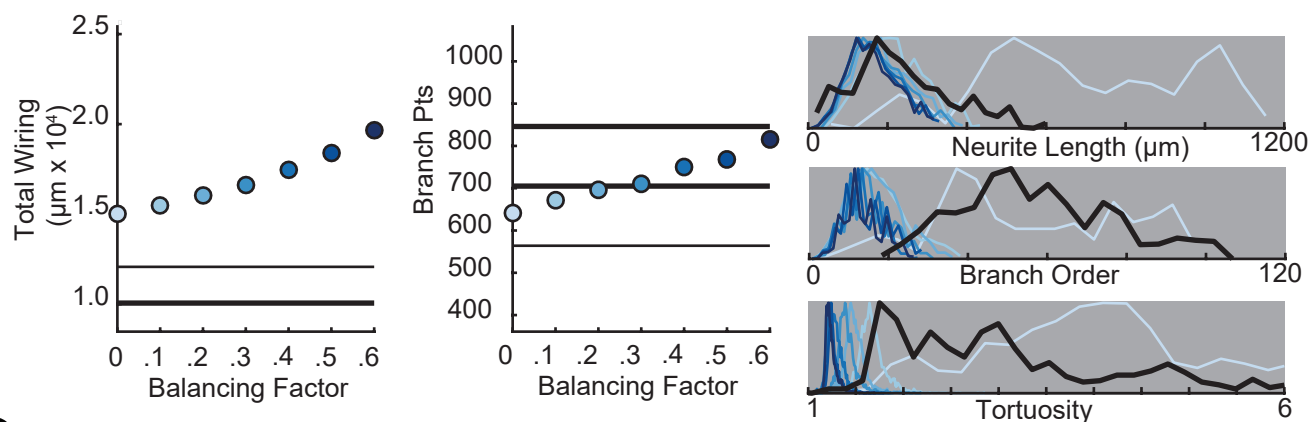

## C LG Neuron 3

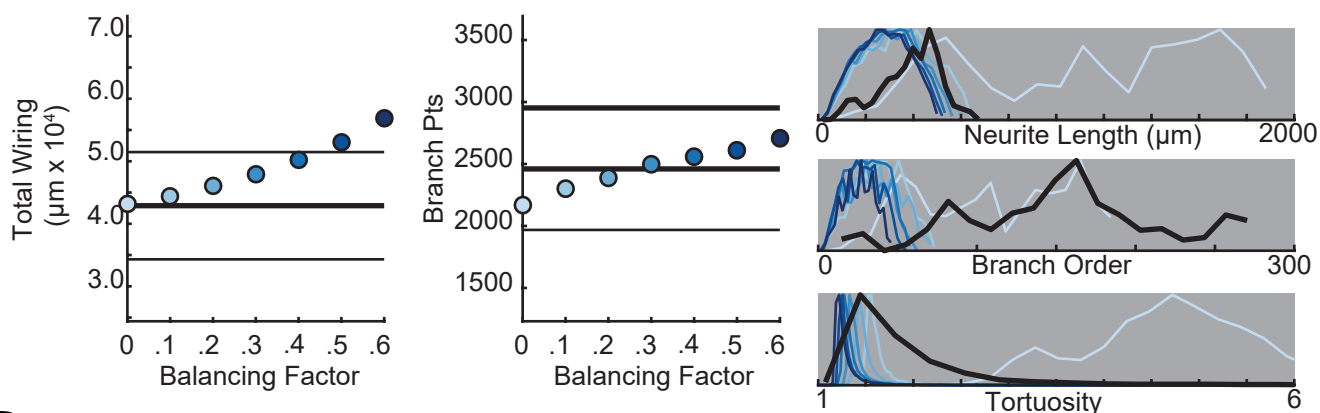

## D LG Neuron 4

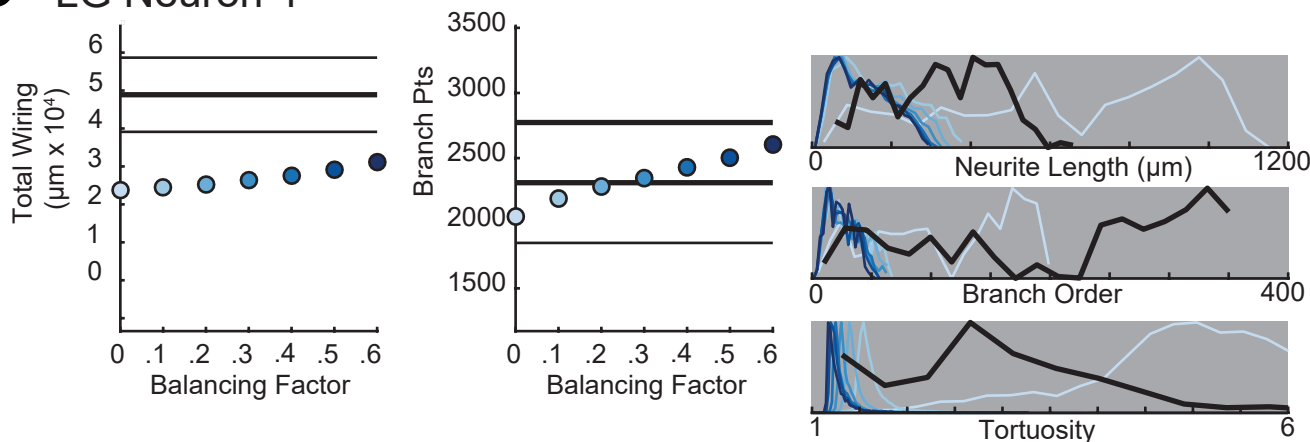

Figure 11-figure supplement 2

Supplement: supp [file elife-22352-supp-v1.zip › elife_poa_e22352_Figure_11_figure_supplement_2.pdf]

## A LP Neuron 1

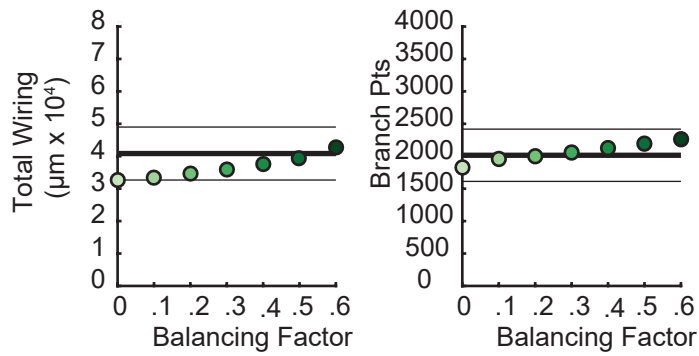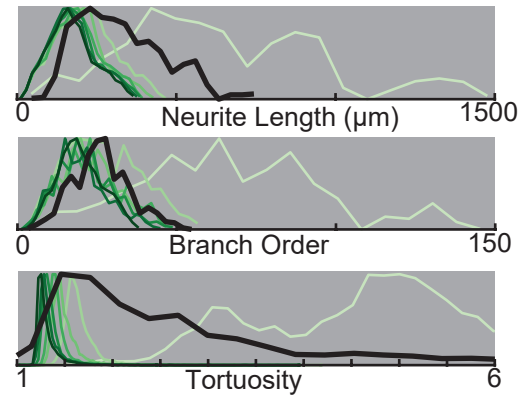

## B LP Neuron 2

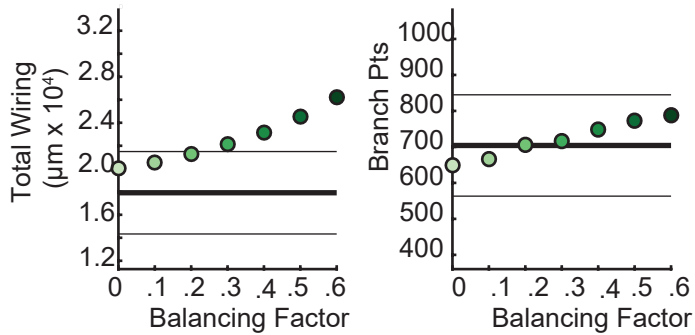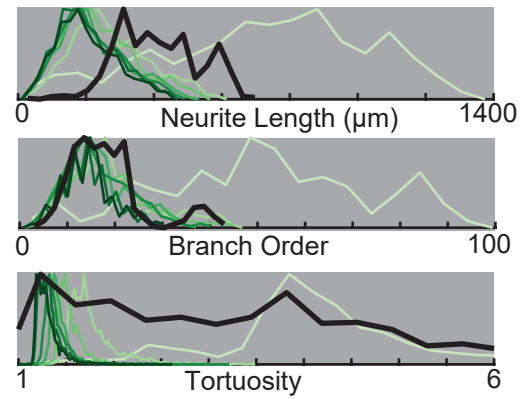

## C LP Neuron 3

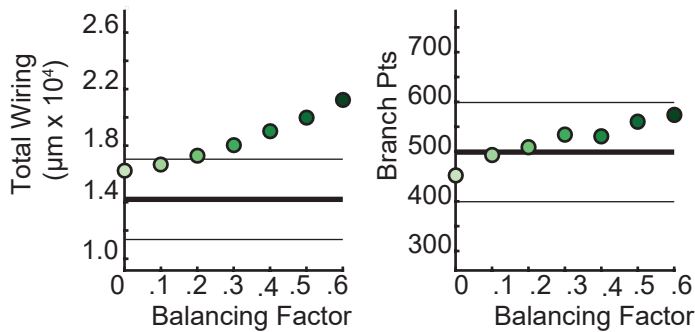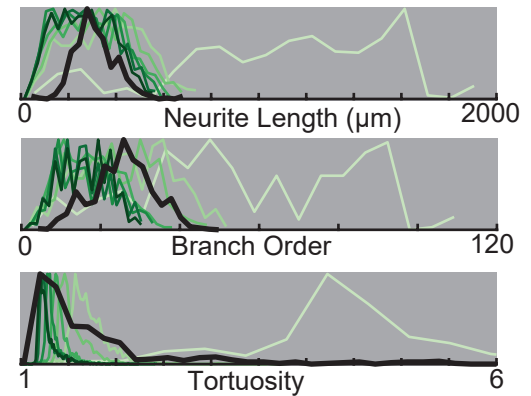

## D LP Neuron 4

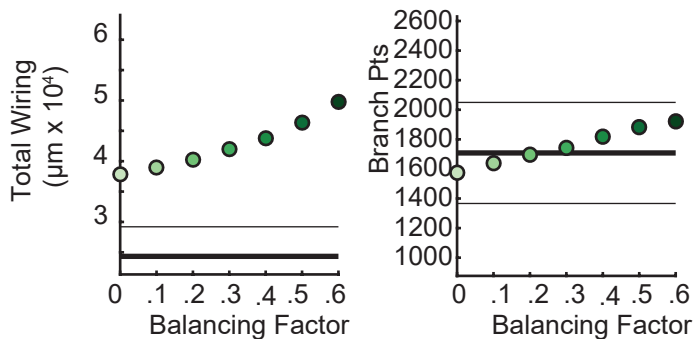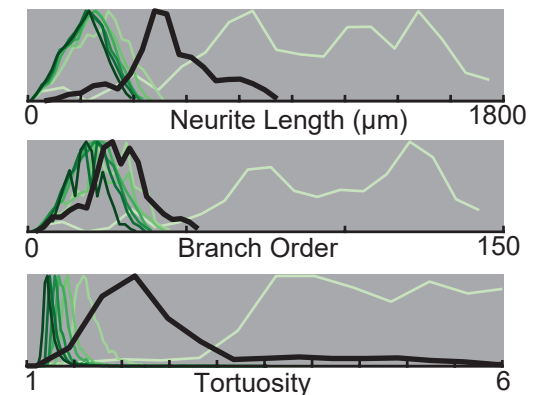

Figure 11-figure supplement 3

Supplement: supp [file elife-22352-supp-v1.zip › elife_poa_e22352_Figure_11_figure_supplement_3.pdf]

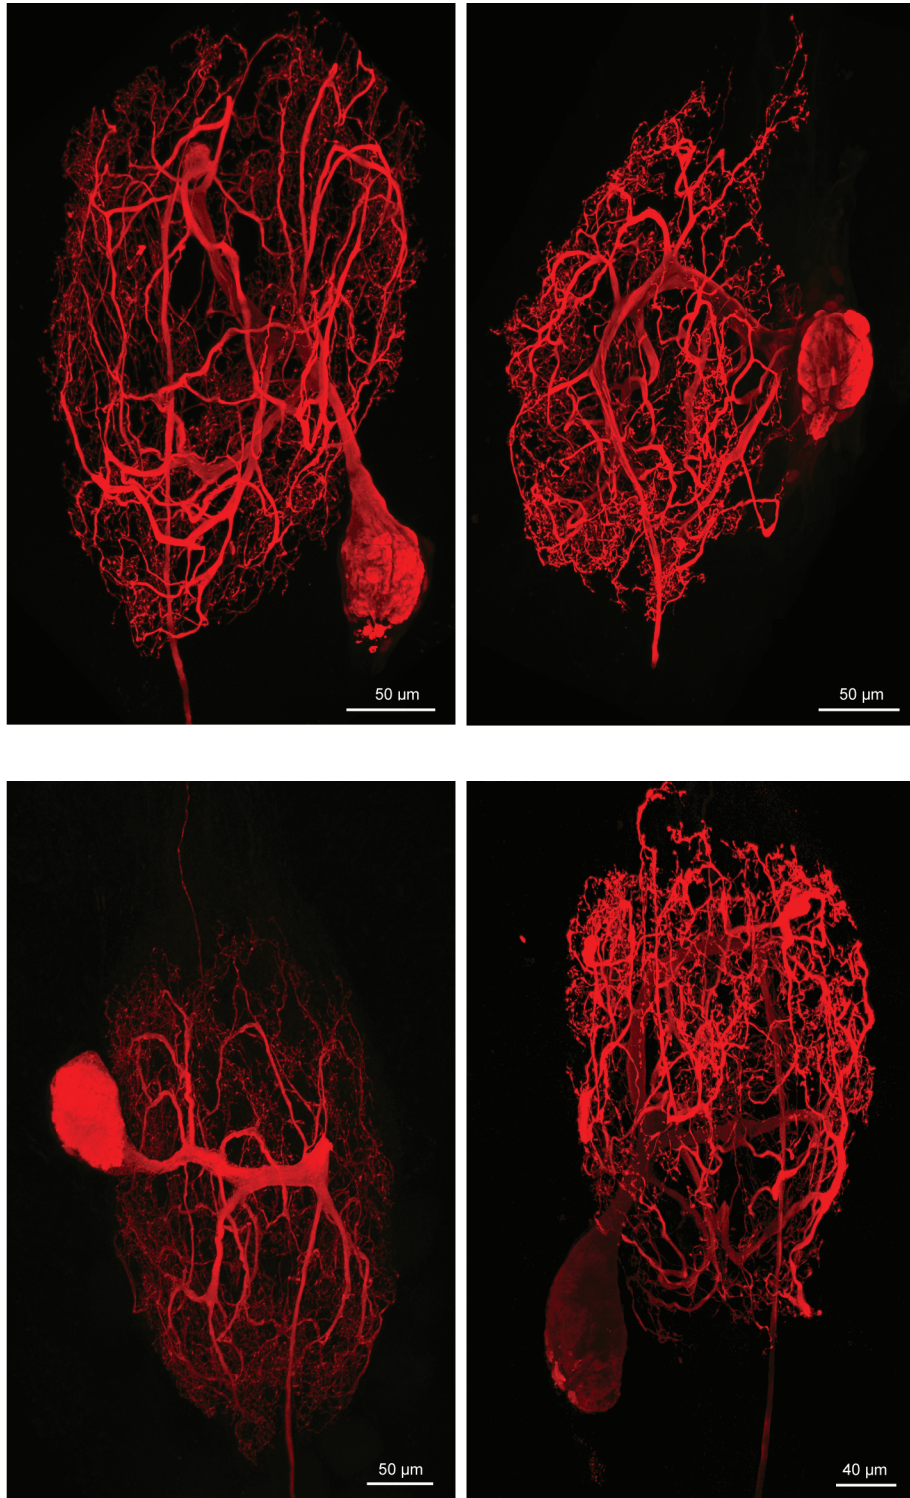

Figure 1-figure supplement 2

Supplement: supp [file elife-22352-supp-v1.zip › elife_poa_e22352_Figure_1_figure_supplement_2.pdf]

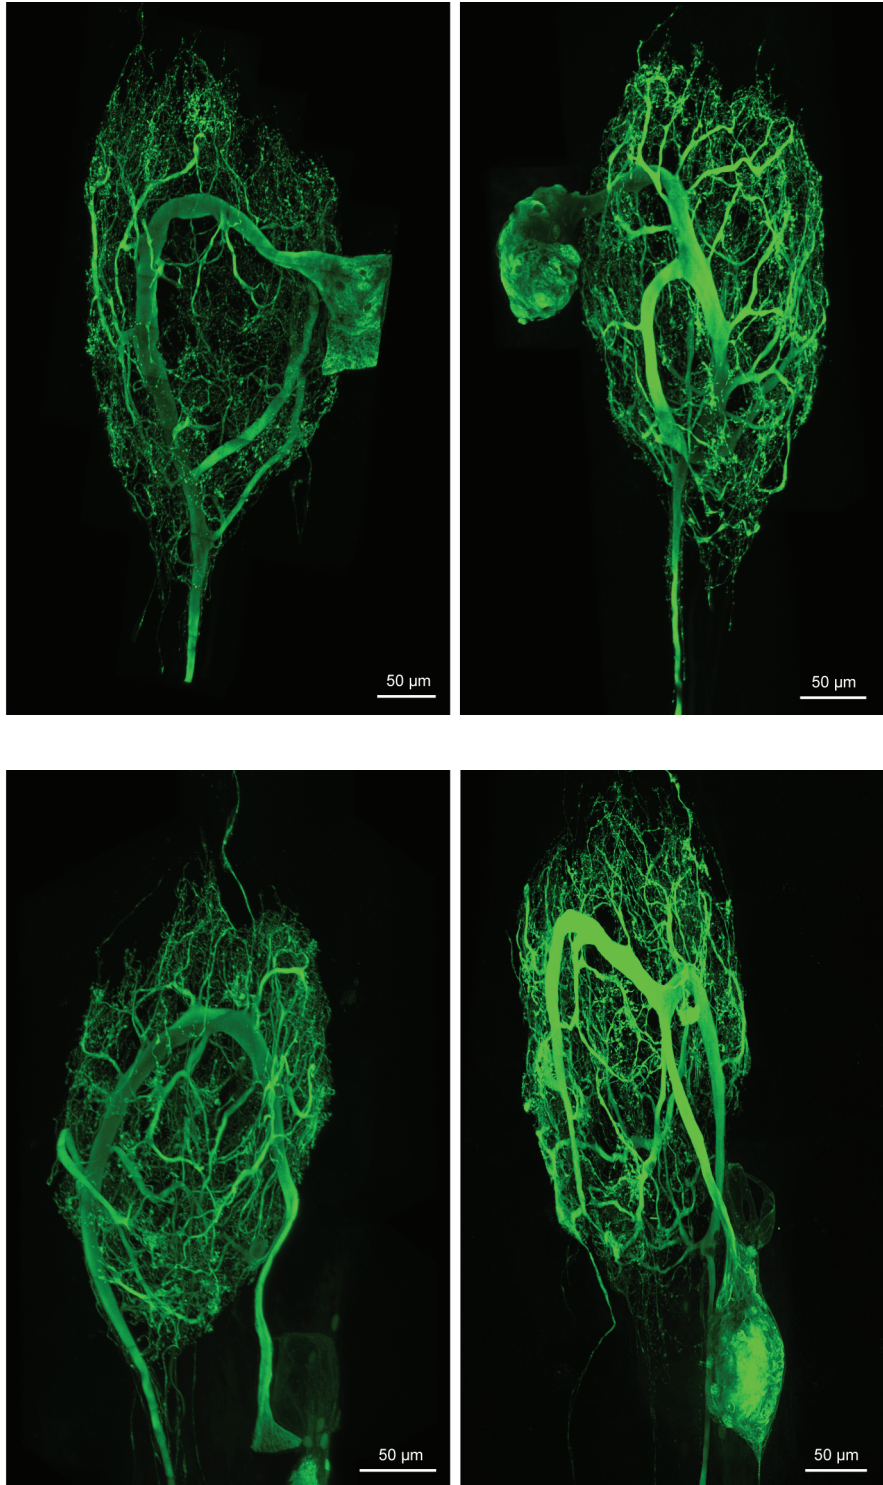

Figure 1-figure supplement 1

Supplement: supp [file elife-22352-supp-v1.zip › elife_poa_e22352_Figure_1_figure_supplement_1.pdf]

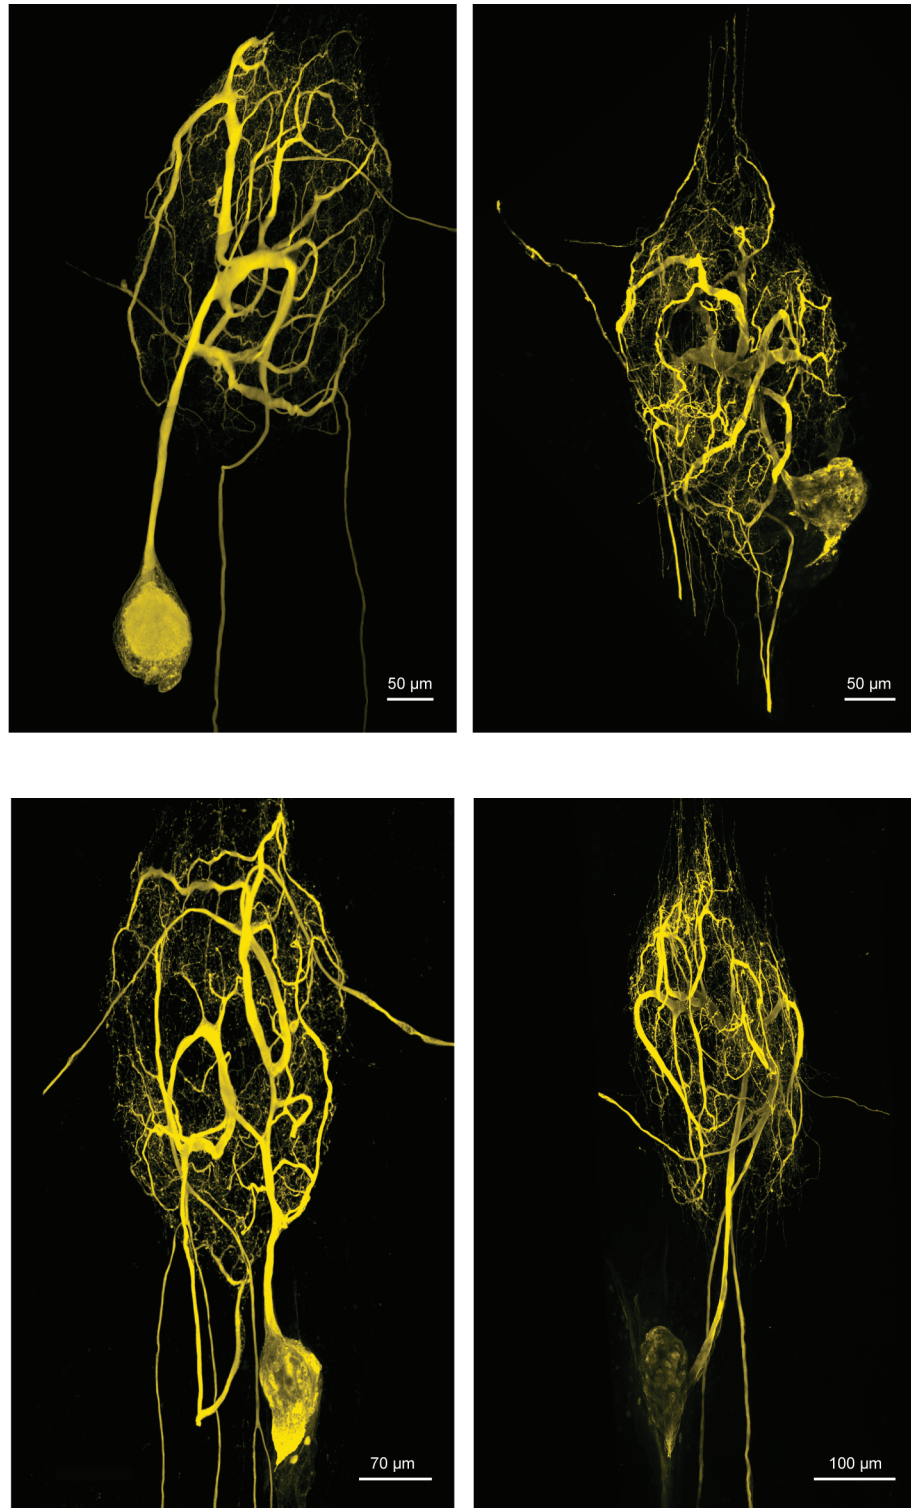

Figure 1-figure supplement 4

Supplement: supp [file elife-22352-supp-v1.zip › elife_poa_e22352_Figure_1_figure_supplement_4.pdf]

## A PD Neuron 1

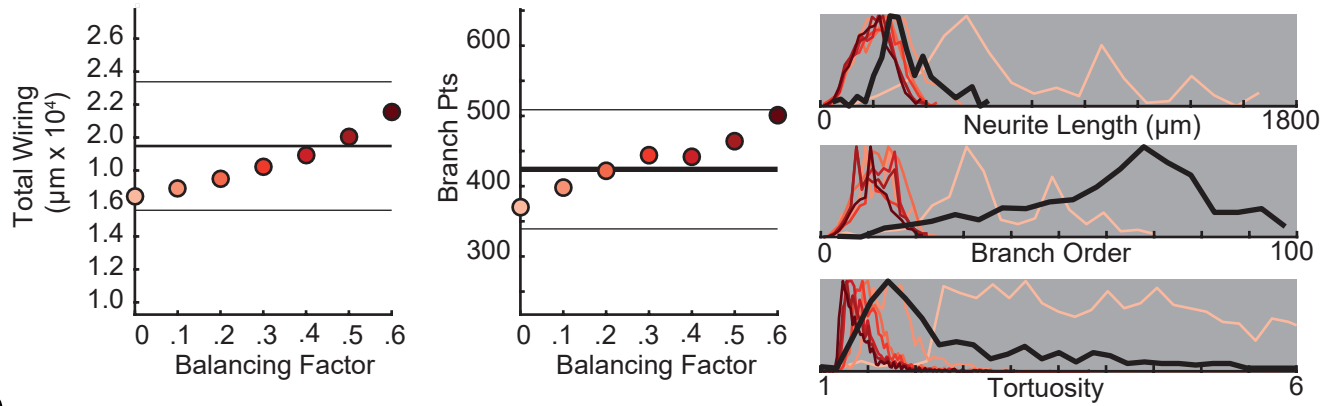

## B PD Neuron 2

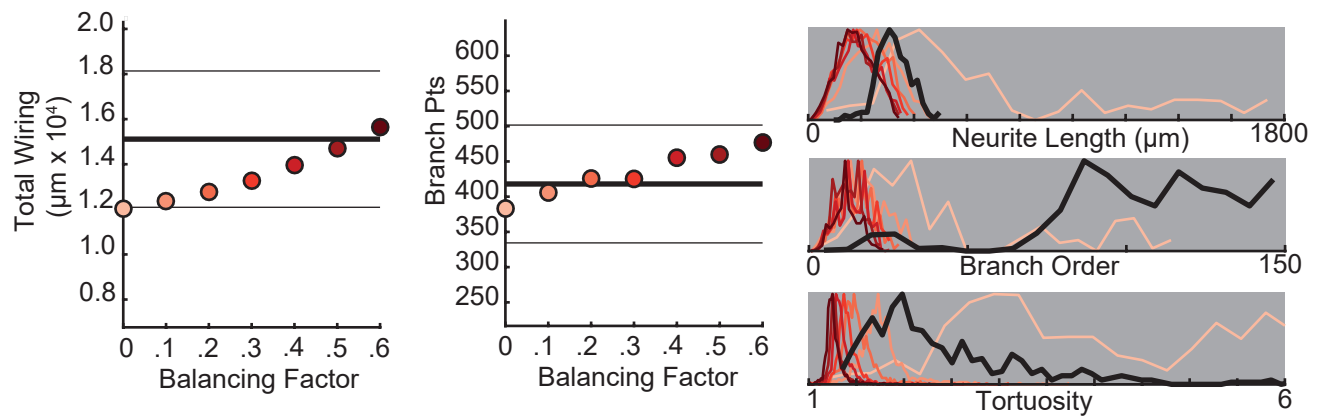

## C PD Neuron 3

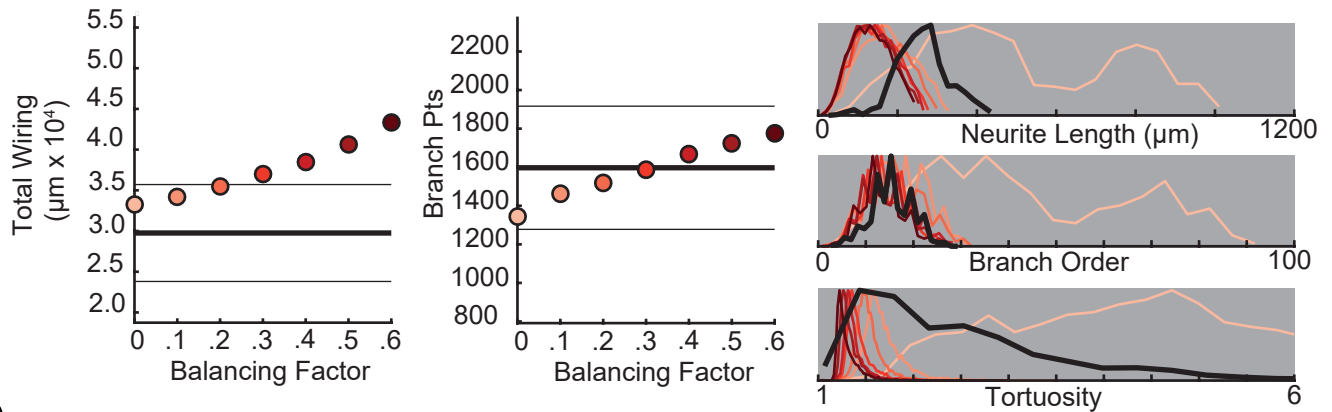

## D PD Neuron 4

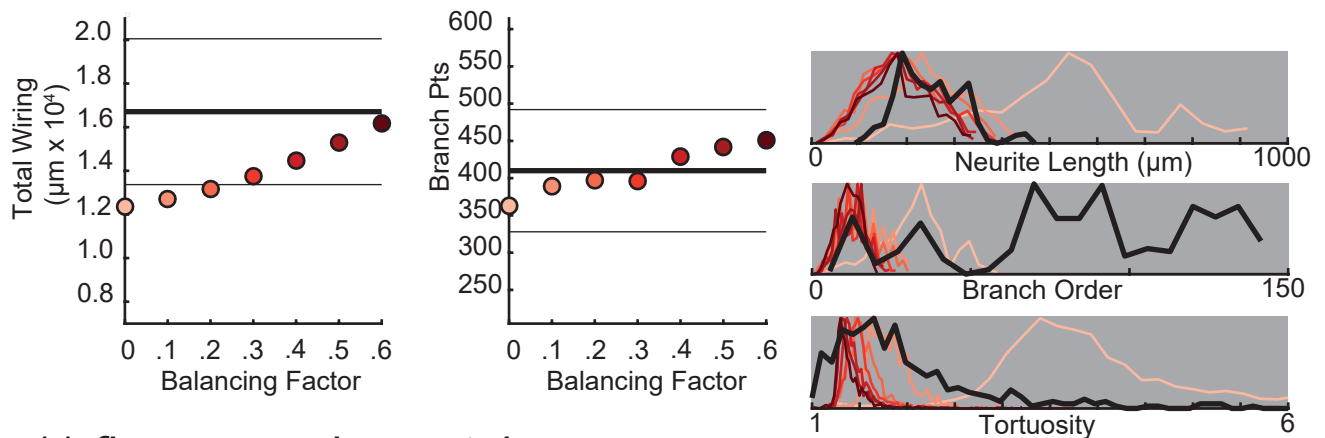

Figure 11-figure supplement 4

Supplement: supp [file elife-22352-supp-v1.zip › elife_poa_e22352_Figure_11_figure_supplement_4.pdf]

## A GM Neuron 1

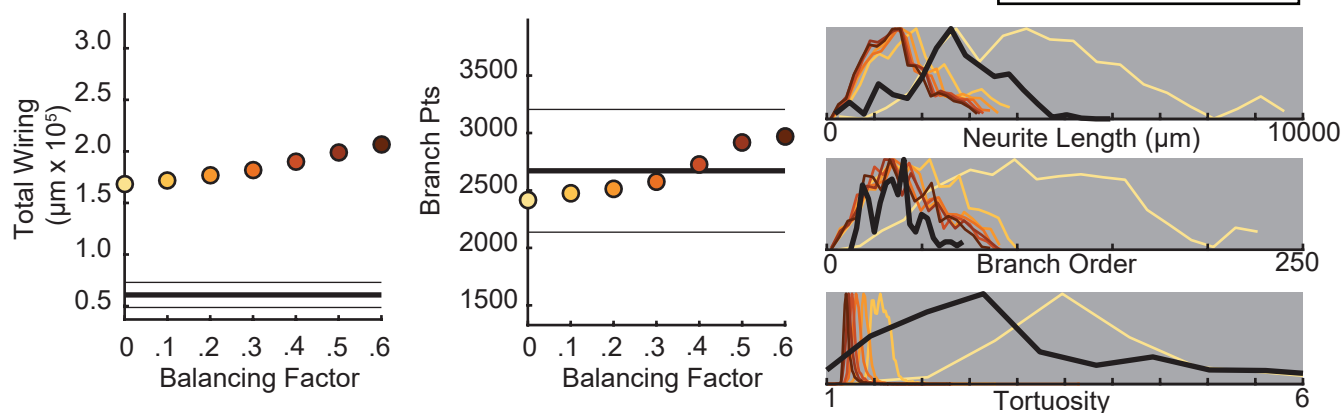

## B GM Neuron 2

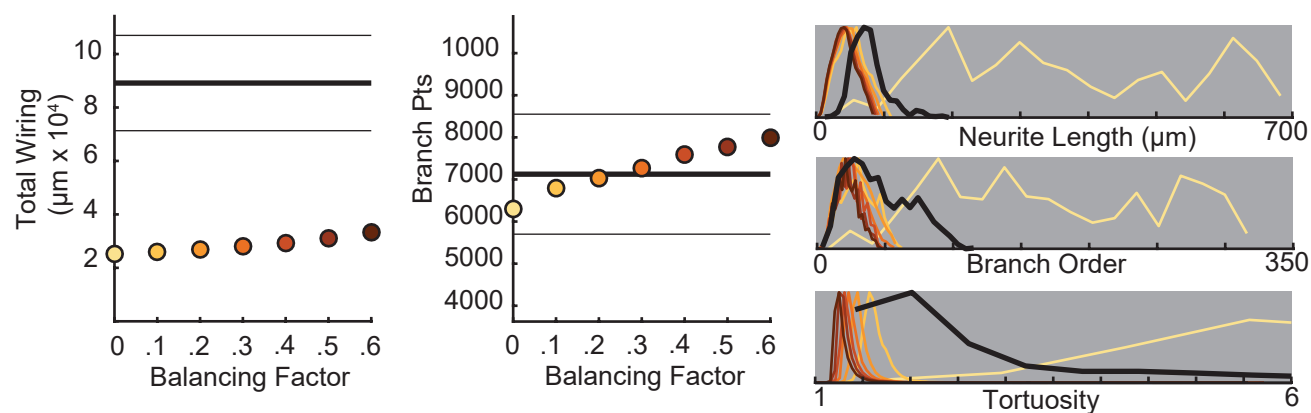

## C GM Neuron 3

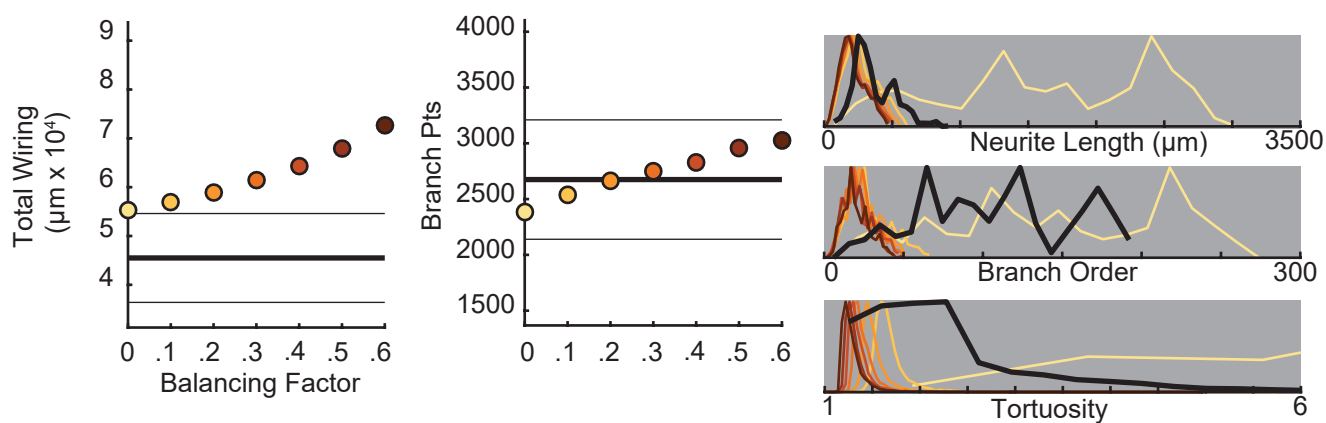

## D GM Neuron 4

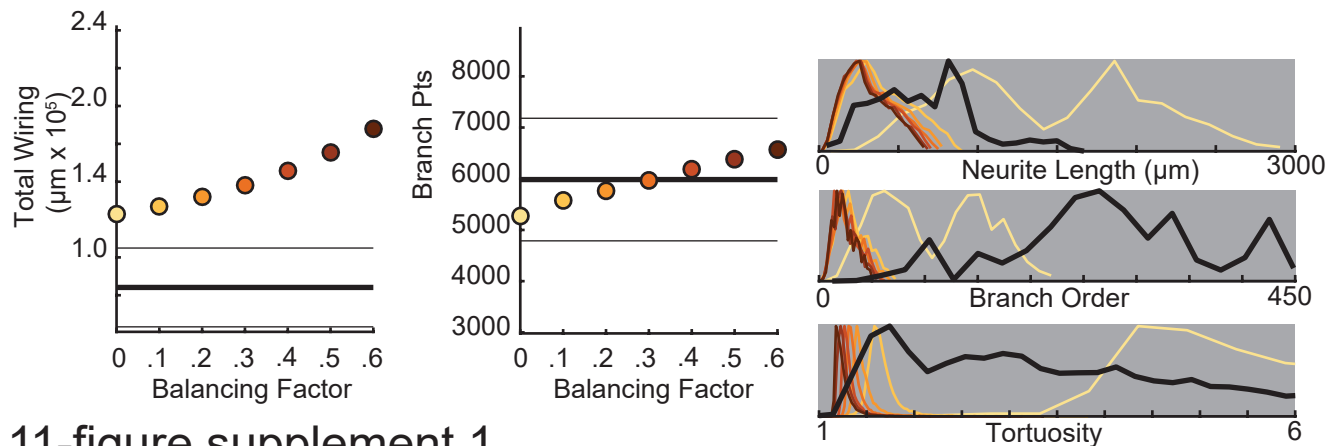

Figure 11-figure supplement 1

Supplement: supp [file elife-22352-supp-v1.zip › elife_poa_e22352_Figure_11_figure_supplement_1.pdf]

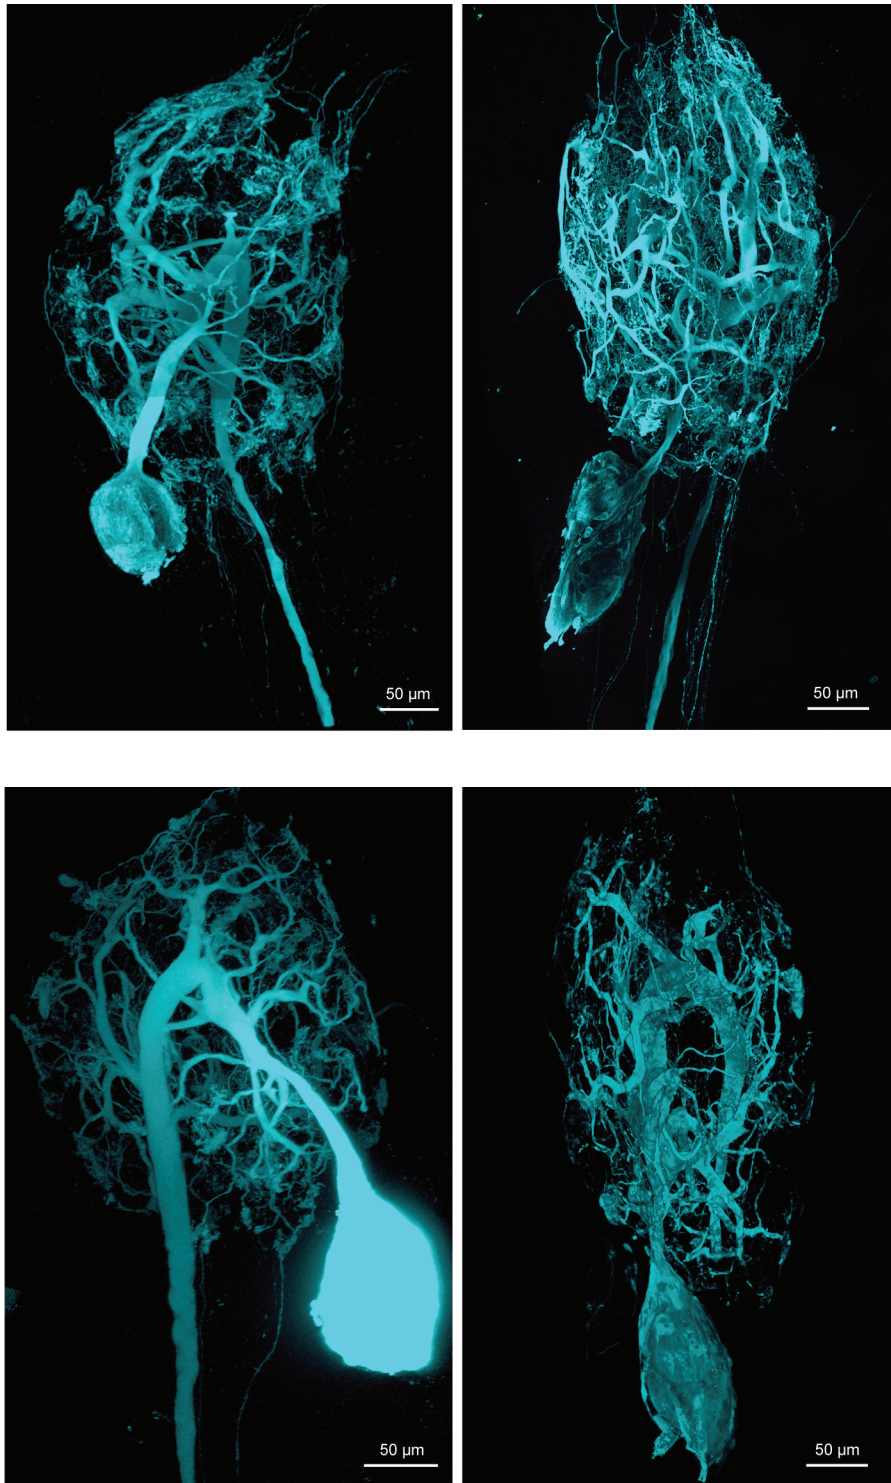

Figure 1-figure supplement 3

Supplement: supp [file elife-22352-supp-v1.zip › elife_poa_e22352_Figure_1_figure_supplement_3.pdf]
